# Supplementary material for: Intranasal DC-targeting vaccine booster elicits durable and cross-clade protective immunity against sarbecoviruses in mice
Source: JCI journal article supplement (doi:10.1172/jci195784), 2026-01-15
Supplement: sd1 [file 1]

# SUPPLEMENTAL MATERIALS

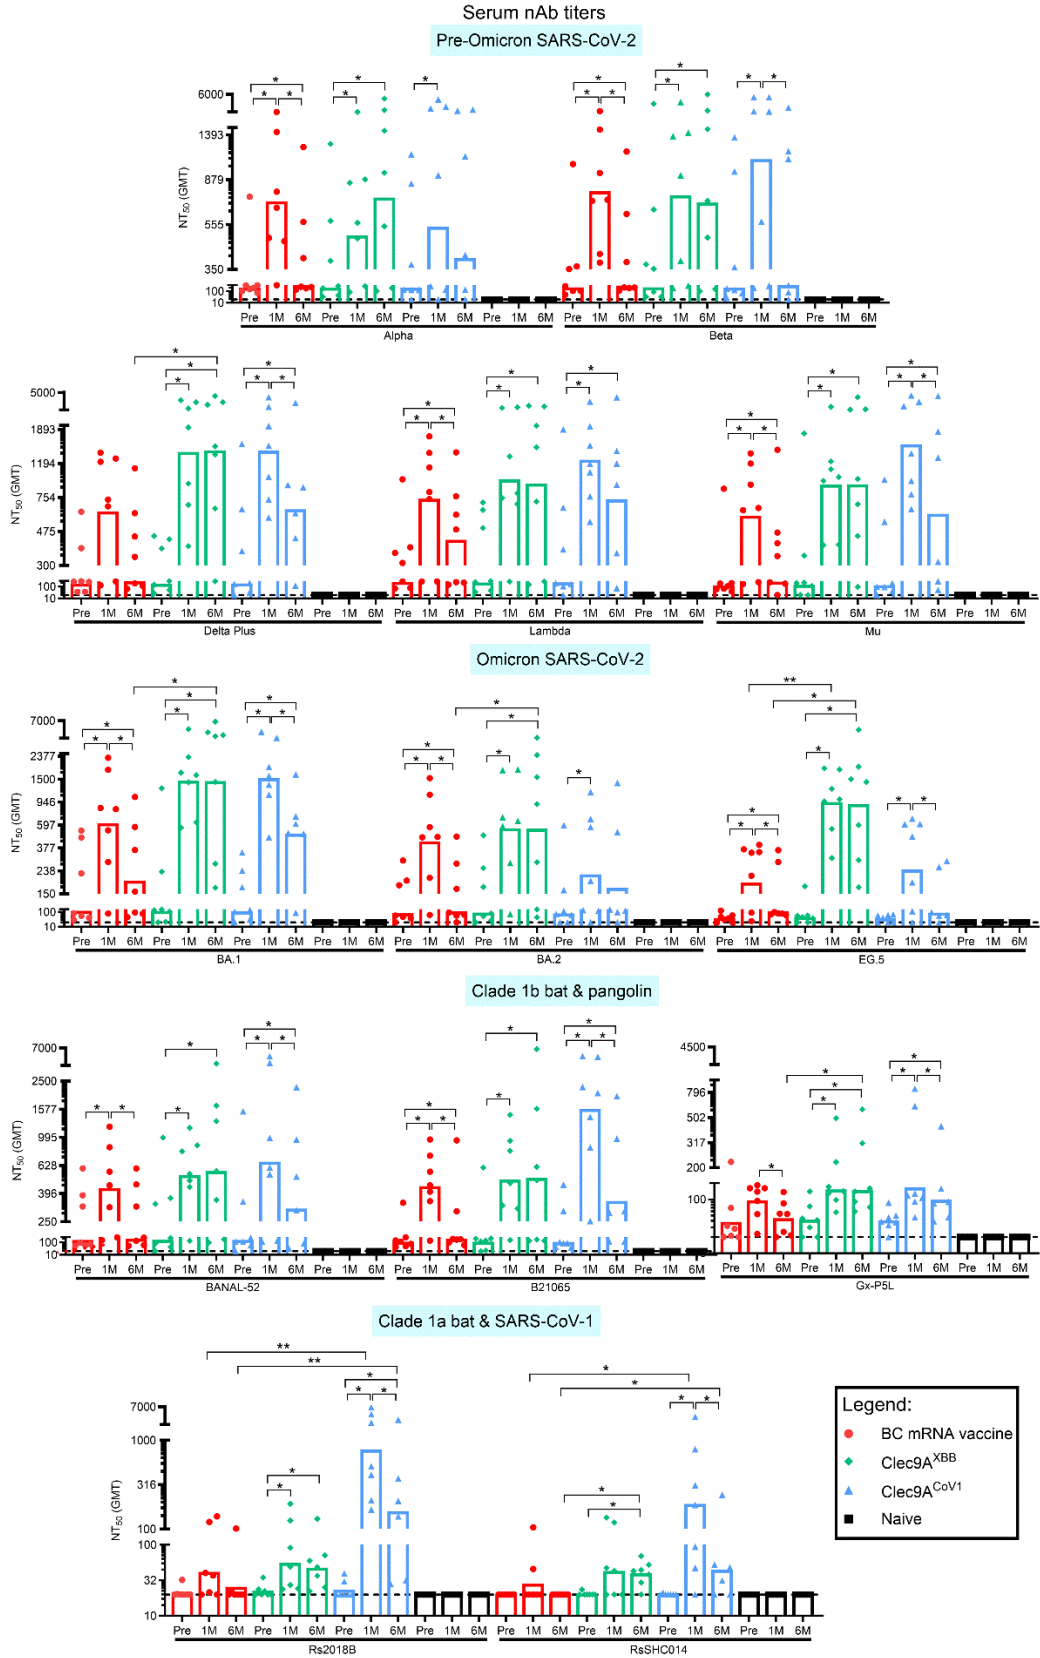

**Figure S1. Serum neutralizing antibody titers upon systemic booster with Clec9A<sup>XBB</sup>, Clec9A<sup>CoV1</sup> or bivalent Comirnaty (BC) mRNA vaccine.** Five to six-week-old BALB/c mice were immunized twice three weeks apart (0.05 µg per dose; i.m) with Pfizer-BioNTech original Comirnaty mRNA vaccine. Three months after the last immunization dose, mice were boosted either with Pfizer-BioNTech BA.4/5 bivalent Comirnaty (BC) mRNA vaccine (0.05 µg; i.m), Clec9A<sup>XBB</sup> (10 µg adjuvanted with 50 µg poly I:C; s.c) or Clec9A<sup>CoV1</sup> (10 µg adjuvanted with 50 µg poly I:C; s.c). A control group of non-immunized mice (naïve) was also included for baseline. The serum nAb titers against 13 sarbecoviruses representative of clades 1b and 1a at pre-boost, one- and six months post-boost were determined by multiplex sVNT. Data are from one representative experiment performed twice with similar results, n = 6-7 per group/experiment. Symbols represent individual animals and data shown are geometric means. Statistical analysis: Non-parametric two-tailed Kruskal Wallis test with Dunn's multiple-comparison test and Friedman test with Dunn's multiple-comparison test. \*p < 0.05, \*\*p < 0.01.

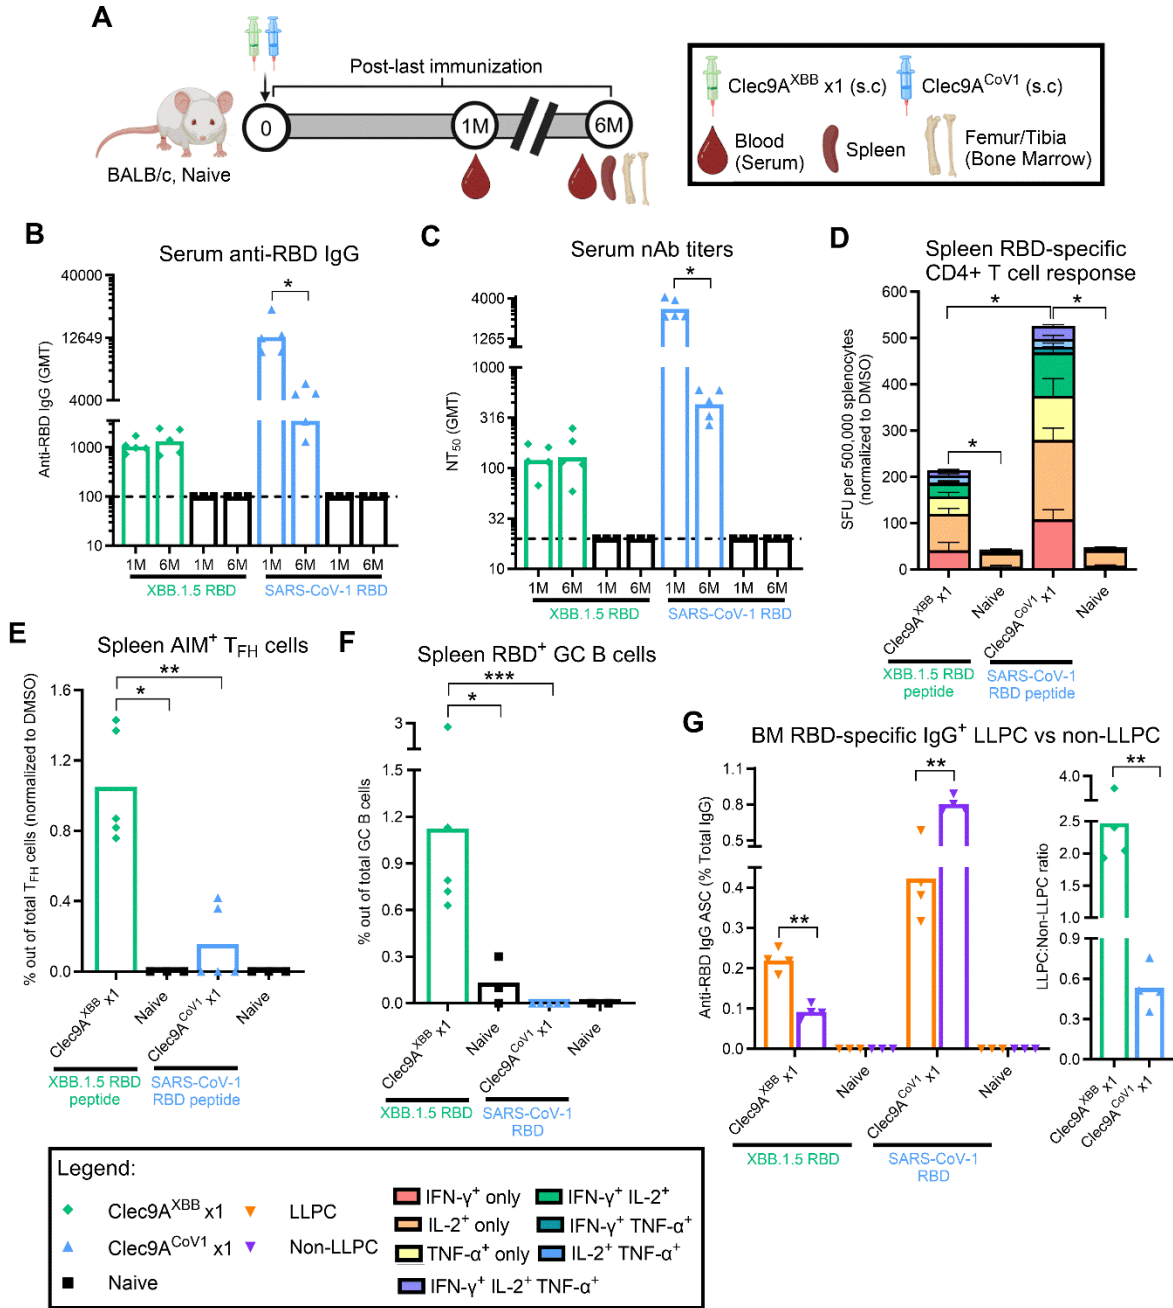

**Figure S2. Durability of immune responses upon single shot immunization with Clec9A<sup>XBB</sup> or Clec9A<sup>CoV1</sup> in naïve mice.** **A**) Five to six-week-old BALB/c mice were immunized with a single dose (2  $\mu$ g adjuvanted with 50  $\mu$ g poly I:C; s.c) of Clec9A<sup>XBB</sup> or Clec9A<sup>CoV1</sup>. **(B, C)** Blood was collected one- and six months after immunization. **(B)** Serum anti-RBD IgG titers against XBB.1.5 and SARS-CoV-1 RBD 1 at one- and six months post-immunization were determined by ELISA. **(C)** Serum nAb titers against

XBB.1.5 and SARS-CoV-1 at one- and six months post-immunization were determined by sVNT. **(D-G)** Mice were euthanized at six months post-immunization, and spleen and BM from femur/tibia were harvested. **(D)** Frequency of IFN- $\gamma$ , IL-2 and/or TNF- $\alpha$  secreting CD4<sup>+</sup>-enriched splenocytes at six months post-immunization was determined by FluoroSPOT upon re-stimulation with XBB.1.5 and SARS-CoV-1 RBD peptides. **(E, F)** Percentage of **(E)** AIM<sup>+</sup> T<sub>FH</sub> and **(F)** RBD<sup>+</sup> GC B cells in spleen at six months post-immunization was determined by flow cytometry. **(G)** Frequency of BM RBD-specific IgG<sup>+</sup> LLPC and non-LLPC (normalized to total IgG) at six months post-immunization was determined by B cell ELISPOT. **(B-G)** Data are from one representative experiment performed twice with similar results, n = 4-5 per group/experiment. **(B, C, E-G)** Symbols represent individual animals and data shown are **(B, C)** geometric means and **(D-G)** means  $\pm$  **(D)** SD. Statistical analysis: Non-parametric two-tailed **(B, C)** Wilcoxon matched-pairs signed rank test and **(D-G)** Mann-Whitney test. \*p < 0.05, \*\*p < 0.01, \*\*\*p < 0.001.

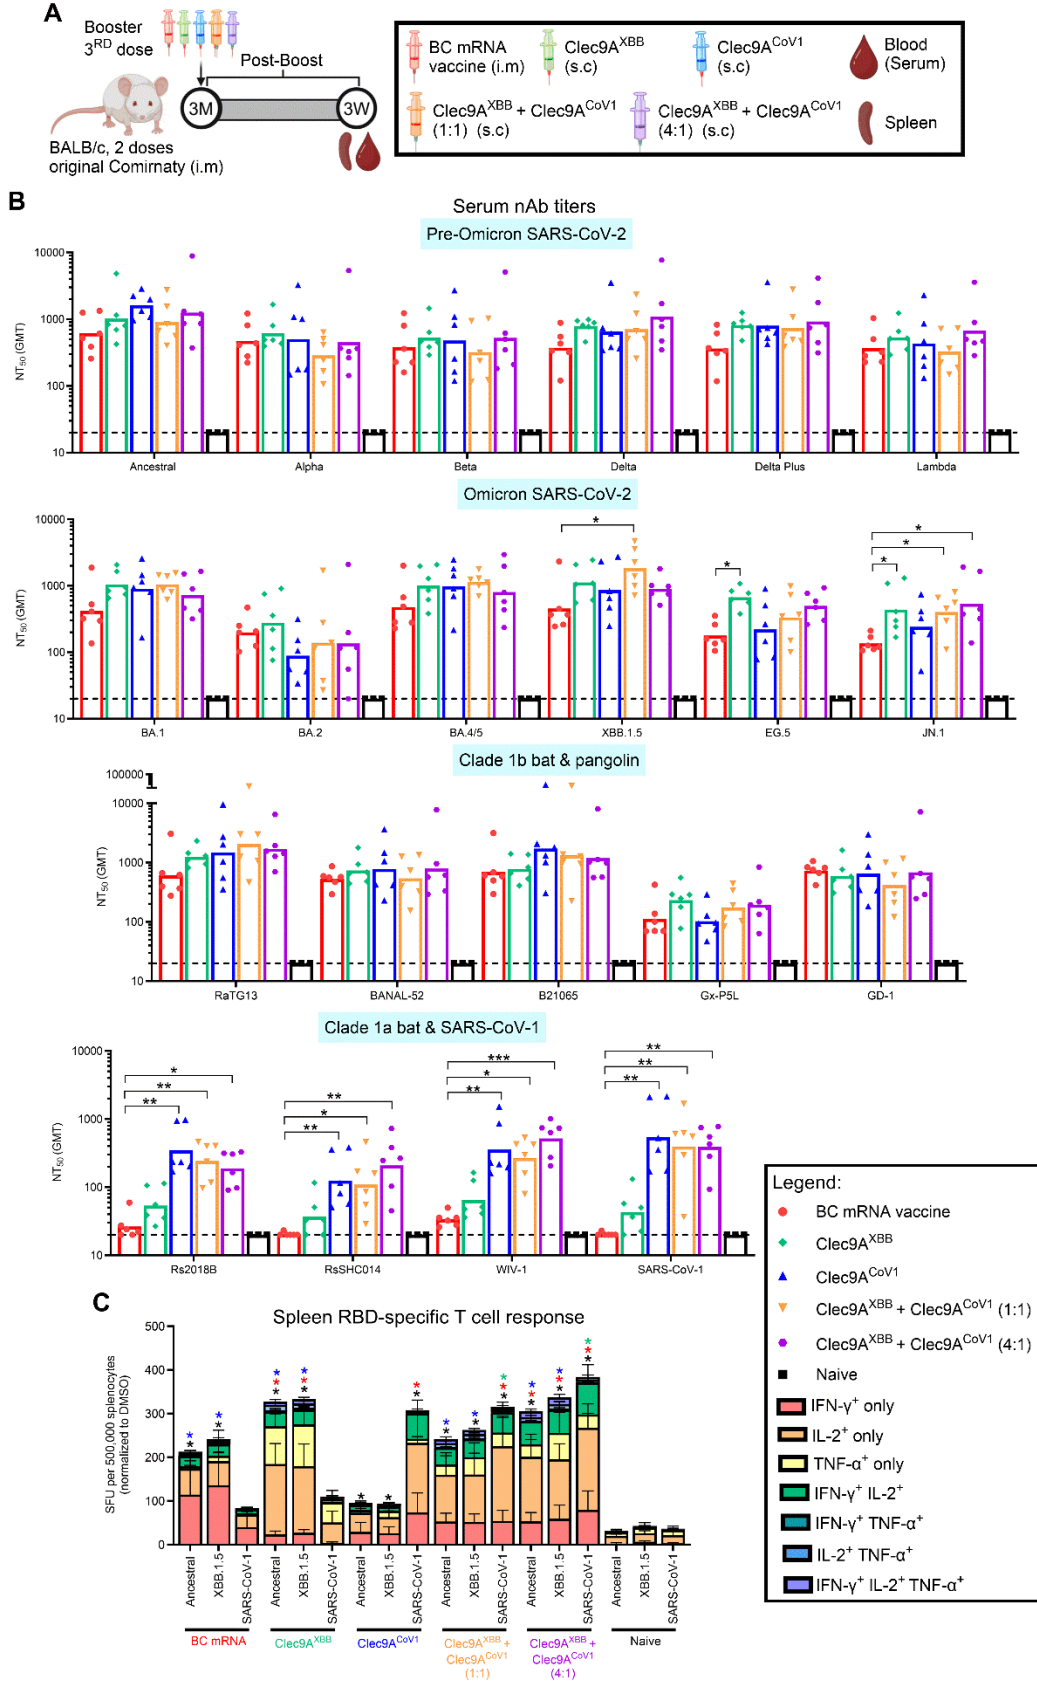

**Figure S3. Dose optimization of [Clec9A<sup>XBB</sup> + Clec9A<sup>CoV1</sup>] booster.** (A) Five to six-week-old BALB/c mice were immunized twice three weeks apart (0.05 µg per dose; i.m) with original Comirnaty mRNA vaccine. Three months after the second immunizing dose, mice were boosted with either BC mRNA vaccine (0.05 µg; i.m), Clec9A<sup>XBB</sup> (10 µg), Clec9A<sup>CoV1</sup> (10 µg), [Clec9A<sup>XBB</sup> + Clec9A<sup>CoV1</sup>] (5 µg + 5 µg) or [Clec9A<sup>XBB</sup> + Clec9A<sup>CoV1</sup>] (8 µg + 2 µg). All Clec9A-based formulations were adjuvanted with 50 µg poly I:C and administered s.c. At three weeks post-boost, blood was collected, and mice were euthanized to harvest spleen. (B) Serum nAb titers against 21 sarbecoviruses from clades 1a and 1b at three weeks post-boost was determined by multiplex sVNT. (C) Frequency of IFN-γ, IL-2 and/or TNF-α secreting splenocytes at three weeks post-boost was determined by FluoroSPOT upon re-stimulation with ancestral SARS-CoV-2, XBB.1.5 and SARS-CoV-1 RBD peptides. (B, C) Data are from one representative experiment performed twice with similar results, n = 5-6 per group/experiment. (B) Symbols represent individual animals and data shown are (B) geometric means and (C) means ± SD. Statistical analysis: Non-parametric two-tailed Kruskal Wallis test with Dunn's multiple-comparison test. \*p < 0.05, \*\*p < 0.01, \*\*\*p < 0.001. (C) Asterisk colors represent statistical significance between corresponding groups.

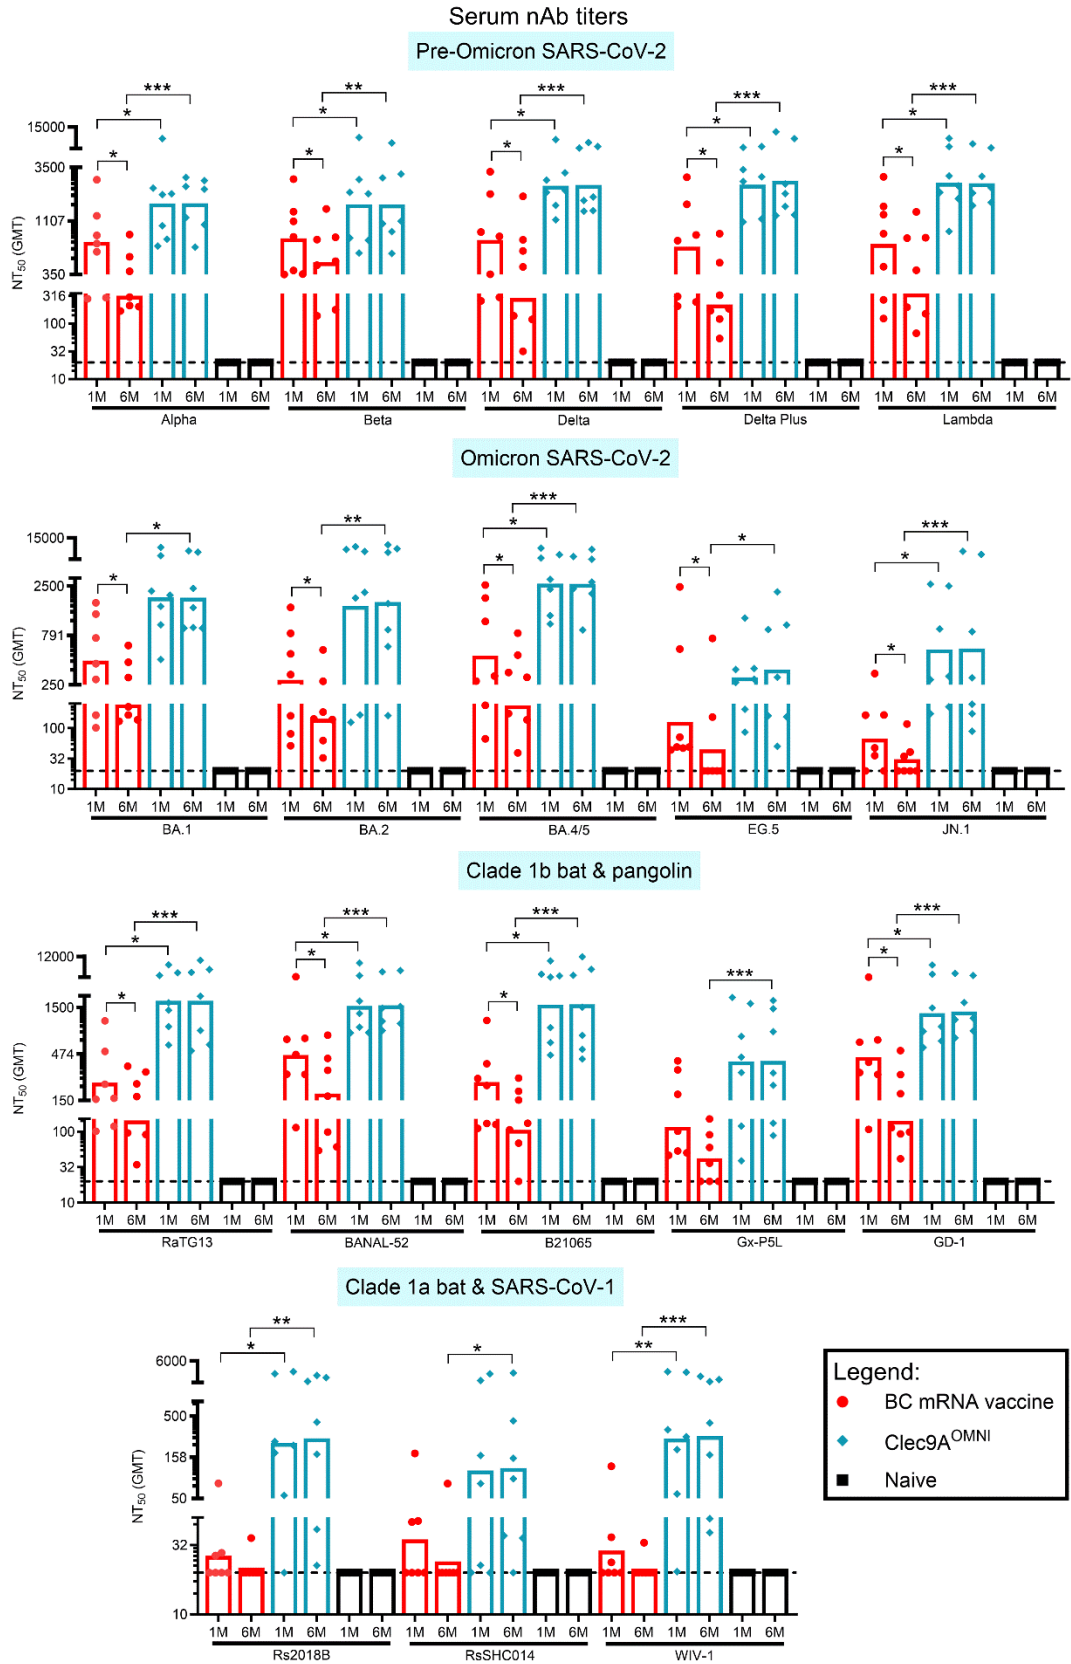

**Figure S4. Serum neutralizing antibody responses upon systemic booster with Clec9A<sup>OMNI</sup> versus BC mRNA vaccine.** Five to six-week-old BALB/c mice were immunized twice three weeks apart (0.05 µg per dose; i.m) with original Comirnaty mRNA vaccine. Three months after the second immunization dose, mice were boosted with either BC mRNA vaccine (0.05 µg; i.m), or Clec9A<sup>OMNI</sup> (8 µg Clec9A<sup>XBB</sup> + 2 µg Clec9A<sup>CoV1</sup> adjuvanted with 50 µg poly I:C; s.c). Serum nAb titers against 18 sarbecoviruses from clades 1a and 1b at one- and six months post-boost were determined by multiplex sVNT. Data are from one representative experiment performed twice with similar results, n = 5-6 per group/experiment. Symbols represent individual animals and data shown are geometric means. Statistical analysis: Non-parametric two-tailed Mann-Whitney test, and Friedman test with Dunn's multiple-comparison test. \*p < 0.05, \*\*p < 0.01, \*\*\*p < 0.001.

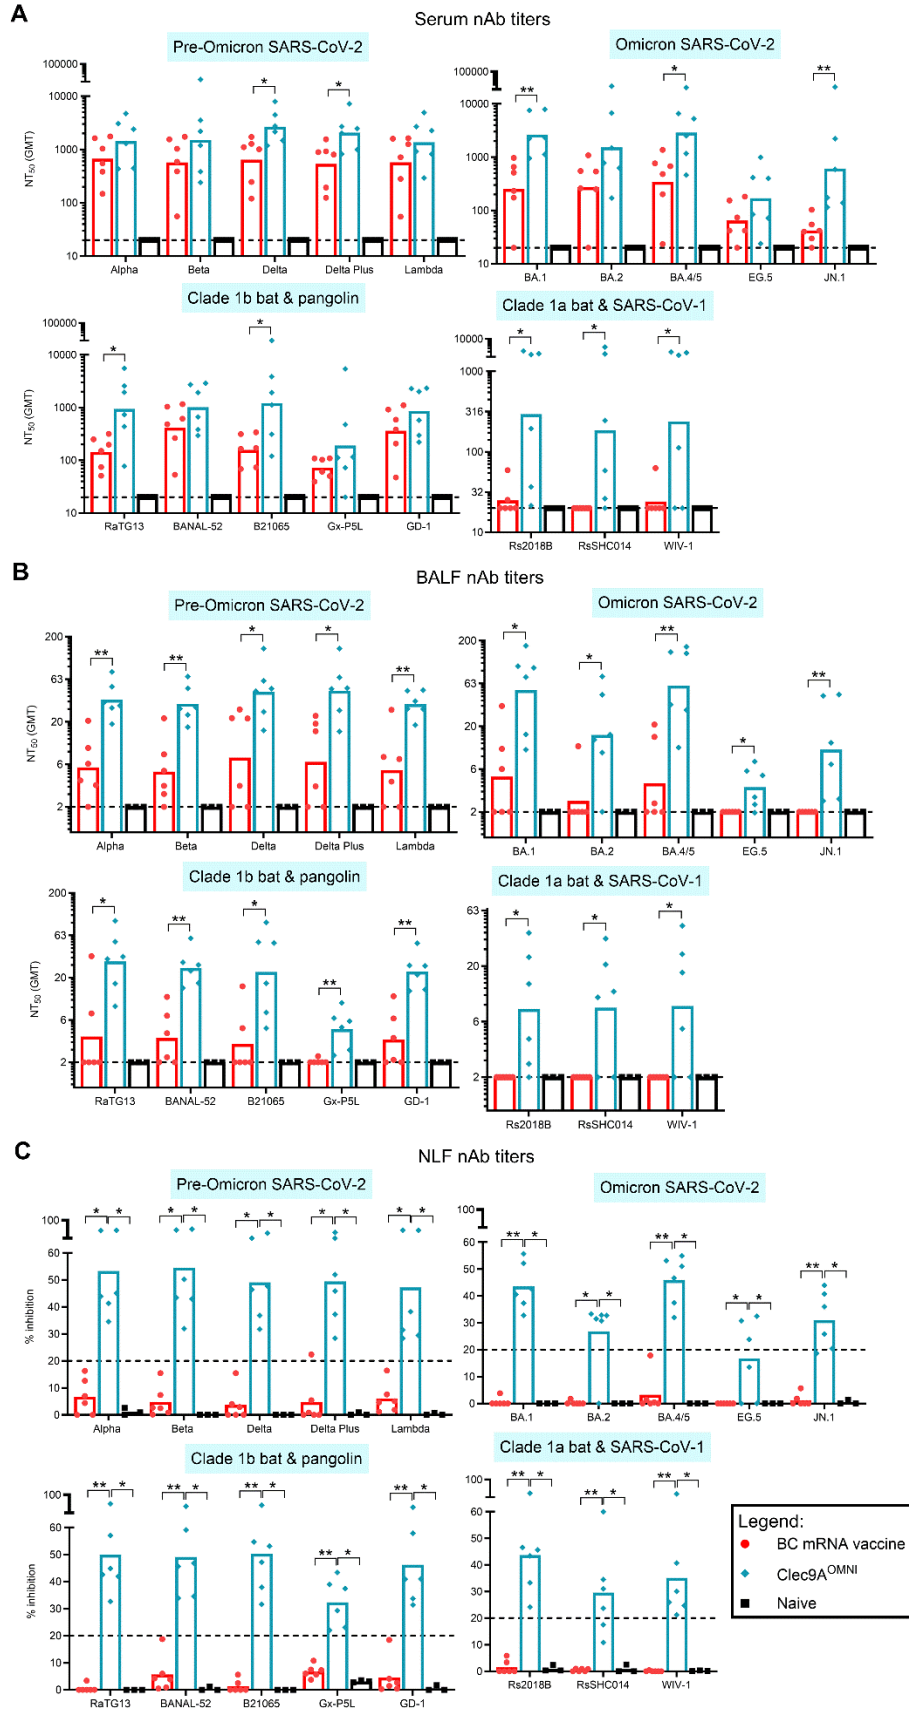

**Figure S5. Neutralizing antibody responses upon nasal booster with Clec9A<sup>OMNI</sup> versus systemic booster with BC mRNA vaccine.** Five to six-week-old BALB/c mice were immunized twice three weeks apart with original Comirnaty mRNA vaccine (0.05 µg per dose; i.m). Three months after the second immunization dose, mice were boosted with either BC mRNA vaccine (0.05 µg; i.m), or Clec9A<sup>OMNI</sup> (4 µg Clec9A<sup>XBB</sup> + 1 µg Clec9A<sup>CoV1</sup> adjuvanted with 50 µg poly I:C; i.n). **(A)** Serum, **(B)** BALF and **(C)** NLF nAb titers against 18 sarbecoviruses from clades 1a and 1b at one month post-boost were determined by multiplex sVNT. **(A-C)** Data are from one representative experiment performed twice with similar results, n = 5-6 per group/experiment. Symbols represent individual animals and data shown are **(A, B)** geometric means and **(C)** means. Statistical analysis: Non-parametric two-tailed **(A, B)** Mann-Whitney test and **(C)** Kruskal Wallis test with Dunn's multiple-comparison test. \*p < 0.05, \*\*p < 0.01.

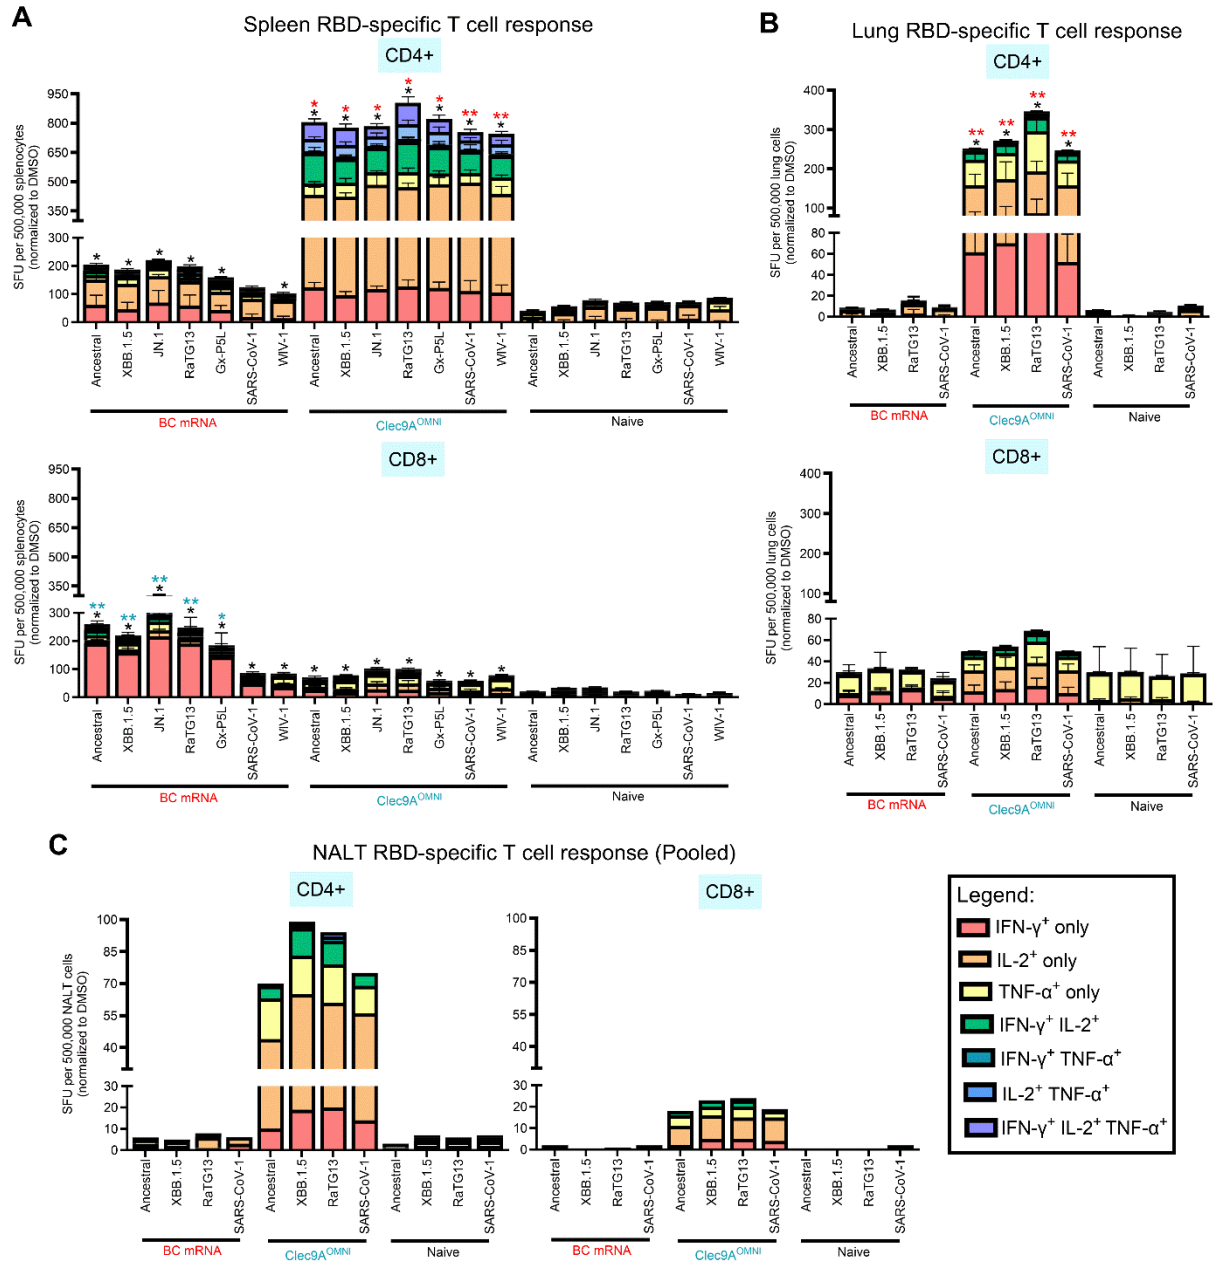

**Figure S6. CD4<sup>+</sup> and CD8<sup>+</sup> T cell responses upon nasal booster with Clec9A<sup>OMNI</sup> versus systemic booster with BC mRNA vaccine.** Five to six-week-old BALB/c mice were immunized twice three weeks apart with original Comirnaty mRNA vaccine (0.05  $\mu$ g per dose; i.m). Three months after the second immunization dose, mice were boosted with either BC mRNA vaccine (0.05  $\mu$ g; i.m), or Clec9A<sup>OMNI</sup> (4  $\mu$ g Clec9A<sup>XBB</sup> + 1  $\mu$ g Clec9A<sup>CoV1</sup> adjuvanted with 50  $\mu$ g poly I:C; i.n). (A-C) At two weeks post-boost, mice were euthanized and the frequencies of IFN- $\gamma$ , IL-2 and/or TNF- $\alpha$  secreting CD4<sup>+</sup> and CD8<sup>+</sup> subsets from

(A) spleen, (B) lungs, and (C) NALT were determined by FluoroSPOT upon restimulation with ancestral SARS-CoV-2, XBB.1.5, JN.1, RaTG13, Gx-P5L, SARS-CoV-1 and WIV-1 RBD peptides. (A-C) Data are from one representative experiment performed twice with similar results, n = 5 per group/experiment. Data shown are means  $\pm$  (A, B) SD. Statistical analysis: (A, B) Non-parametric two-tailed Kruskal Wallis test with Dunn's multiple-comparison test. \*p < 0.05, \*\*p < 0.01. Asterisk colors represent statistical significance between corresponding groups.

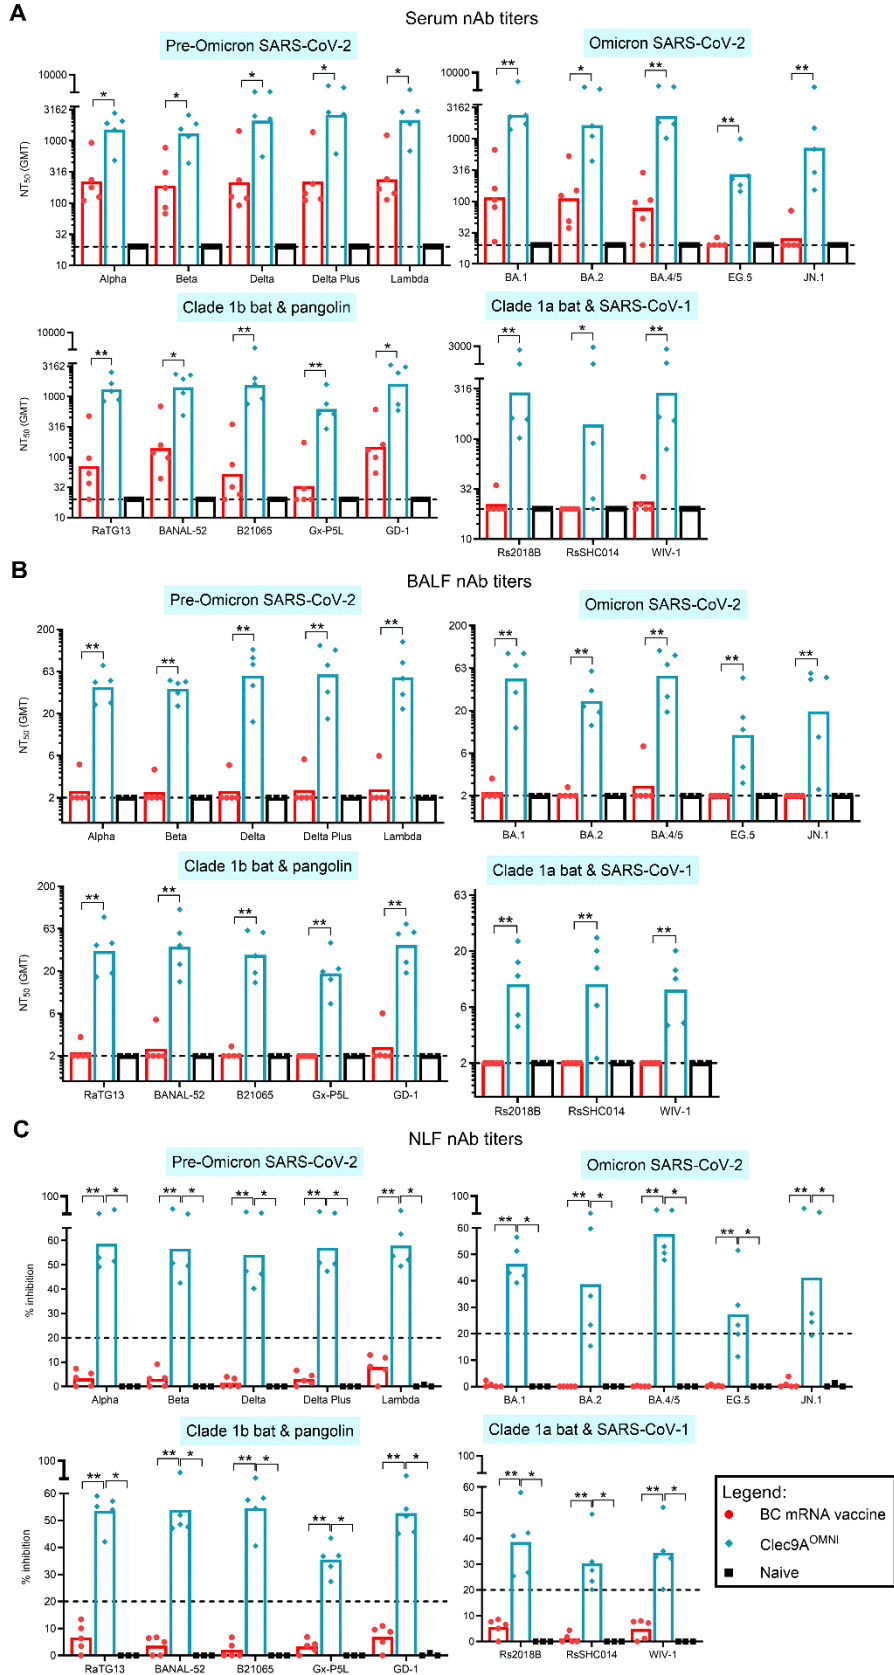

**Figure S7. Long-term neutralizing antibody responses upon nasal booster with Clec9A<sup>OMNI</sup> versus systemic booster with BC mRNA vaccine.** Five to six-week-old BALB/c mice were immunized twice three weeks apart with original Comirnaty mRNA vaccine (0.05 µg per dose; i.m). Three months after the second immunization dose, mice were boosted with either BC mRNA vaccine (0.05 µg; i.m), or Clec9A<sup>OMNI</sup> (4 µg Clec9A<sup>XBB</sup> + 1 µg Clec9A<sup>CoV1</sup> adjuvanted with 50 µg poly I:C; i.n). **(A)** Serum, **(B)** BALF and **(C)** NLF nAb titers against 18 sarbecoviruses from clades 1a and 1b at six months post-boost were determined by multiplex sVNT. **(A-C)** Data are from one representative experiment performed twice with similar results, n = 5-6 per group/experiment. Symbols represent individual animals and data shown are **(A, B)** geometric means and **(C)** means. Statistical analysis: Non-parametric two-tailed **(A, B)** Mann-Whitney test and **(C)** Kruskal Wallis test with Dunn's multiple-comparison test. \*p < 0.05, \*\*p < 0.01.

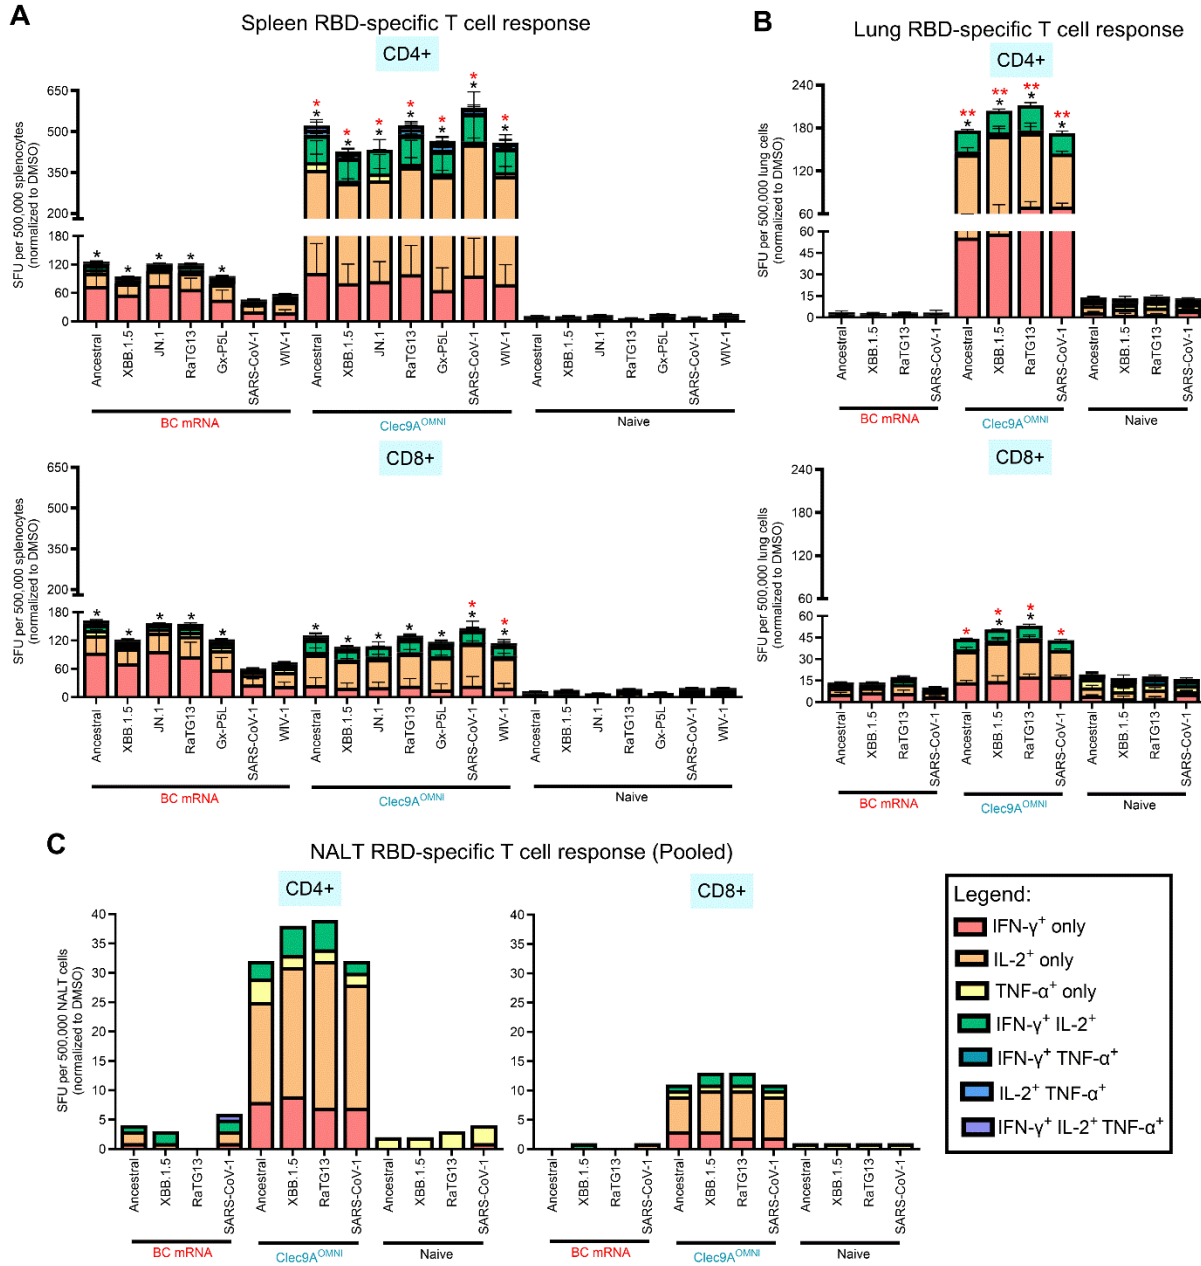

**Figure S8. Long-term CD4<sup>+</sup> and CD8<sup>+</sup> T cell responses upon nasal booster with Clec9A<sup>OMNI</sup> versus systemic booster with BC mRNA vaccine.** Five to six-week-old BALB/c mice were immunized twice three weeks apart with original Comirnaty mRNA vaccine (0.05  $\mu$ g per dose; i.m). Three months after the second immunization dose, mice were boosted with either BC mRNA vaccine (0.05  $\mu$ g; i.m), or Clec9A<sup>OMNI</sup> (4  $\mu$ g Clec9A<sup>XBB</sup> + 1  $\mu$ g Clec9A<sup>CoV1</sup> adjuvanted with 50  $\mu$ g poly I:C; i.n). (A-C) Frequencies of IFN- $\gamma$ , IL-2 and/or TNF- $\alpha$  secreting CD4<sup>+</sup> and CD8<sup>+</sup> subsets in (A) spleen, (B) lungs, and (C) NALT were determined

at four months post-boost by FluoroSPOT upon restimulation with ancestral SARS-CoV-2, XBB.1.5, JN.1, RaTG13, Gx-P5L, SARS-CoV-1 and WIV-1 RBD peptides. **(A-C)** Data are from one representative experiment performed twice with similar results,  $n = 5$  per group/experiment. Data shown are means  $\pm$  **(A, B)** SD. Statistical analysis: **(A, B)** Non-parametric two-tailed Kruskal Wallis test with Dunn's multiple-comparison test. \* $p < 0.05$ , \*\* $p < 0.01$ . Asterisk colors represent statistical significance between corresponding groups.

**A**

|                |     |                                                               |     |
|----------------|-----|---------------------------------------------------------------|-----|
| XBB.1.5 RBD    | 1   | KSFTVEKGIYQTSNFRVQPTESIVRFPNITNLCPFHEVFNATTFASVYAWNRRKRISNCVA | 60  |
|                |     | KSF ++KGIYQTSNFRV P+ +VREFPNITNLCPF EVFNAT F SVYAW RK+ISNCVA  |     |
| SARS-CoV-1 RBD | 1   | KSFEIDKGIYQTSNFRVVPDGDVVRFPNITNLCPFGEVFNATKFPSSVYAWERKKISNCVA | 60  |
| <br>           |     |                                                               |     |
| XBB.1.5 RBD    | 61  | DYSVIYNFAPFFAFKCYGVSPTKLNLDLCTNVYADSFVIRGNEVSQIAPGQTGNIADYNY  | 120 |
|                |     | DYSV+YN F FKCYSVS TKLNLDLCF+NVIYADSFV++G++V QIAPGQTG IADYNY   |     |
| SARS-CoV-1 RBD | 61  | DYSVLYNSTFFSTFKCYGVSATKLNLDLCSNVYADSFVVKGDVVRQIAPGQTGVIADYNY  | 120 |
| <br>           |     |                                                               |     |
| XBB.1.5 RBD    | 121 | KLPDDFTGCVIAWNSNKLDSPSGNYNYLYRLFRKSKLKPPERDISTEIQAGNKPCNGV    | 180 |
|                |     | KLPDDF GCV+AWN+ +D+ +GNYNY YR R KL+PPERDIS + KPC              |     |
| SARS-CoV-1 RBD | 121 | KLPDDFMGCVLAWNTRNIDATSTGNYNYKYRYLRHGKLRPPERDISNVVFPDGGKPCCTPP | 180 |
| <br>           |     |                                                               |     |
| XBB.1.5 RBD    | 181 | AGPNCYSPLQSYGFRPTYGVGHQPYRVVVLSEFELLHAPATVCGPKKSTNLVKNKCVNFNF | 240 |
|                |     | A NCY PL YGF T G+G+QPYRVVVLSEFELL+APATVCGPK ST+L+KN+CVNFNF    |     |
| SARS-CoV-1 RBD | 181 | A-LNCYWPLNDYGFYTTTGIGYQPYRVVVLSEFELLNAPATVCGPKLSTDLIKNQCVNFNF | 239 |
| <br>           |     |                                                               |     |
| XBB.1.5 RBD    | 241 | NGLTGTG                                                       | 247 |
|                |     | NGLTGTG                                                       |     |
| SARS-CoV-1 RBD | 240 | NGLTGTG                                                       | 246 |

**B**

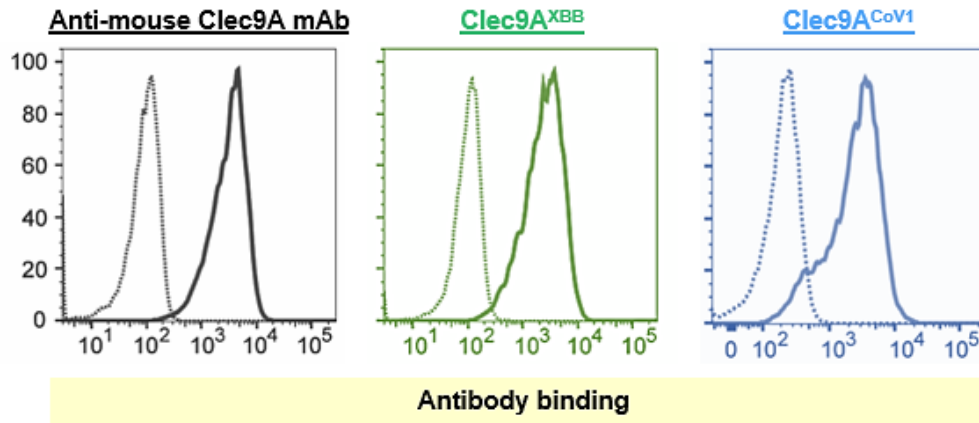

**Figure S9. Antigenic sequence and validation of Clec9A-RBD constructs. (A)** BLAST amino acid sequence alignment for RBD antigens (XBB.1.5 and SARS-CoV-1) used for expression of Clec9A-RBD constructs (Clec9A<sup>XBB</sup> and Clec9A<sup>CoV1</sup>). **(B)** Binding of Clec9A-RBD constructs to mouse Clec9A was verified by flow cytometry. CHO-K1 (dotted lines) or CHO-Clec9A cells (solid lines) were incubated with control anti-mouse Clec9A mAb (black, left panel), purified Clec9A<sup>XBB</sup> construct (green, middle panel) or

Clec9A<sup>CoV1</sup> construct (blue, right panel). Binding was detected with PE-conjugated anti-rat Ig and dead cells were excluded by forward/side scatter and live/dead staining.

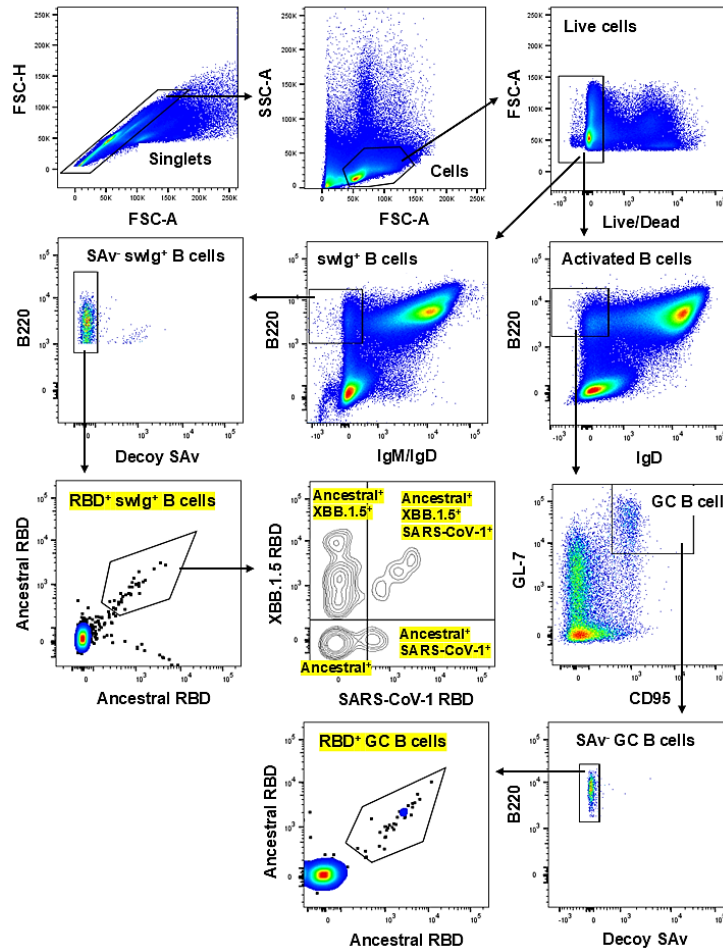

**Figure S10. Gating strategy to identify antigen-specific swIg<sup>+</sup> and GC B cell subsets.** Single cells were first identified via FSC-H/FSC-A and SSC-A/FSC-A. Dead cells were excluded with eFluor780 Fixable Viability Dye, and swIg<sup>+</sup> (B220<sup>+</sup> IgD<sup>-</sup> IgM<sup>-</sup>) and activated (B220<sup>+</sup> IgD<sup>+</sup>) B cells were identified from live cell population (Live/Dead). For the former, swIg<sup>+</sup> B cells that bind non-specifically to SA<sub>v</sub> were excluded using decoy SA<sub>v</sub> probe, and RBD-specific swIg<sup>+</sup> B cells were identified from the SA<sub>v</sub><sup>-</sup> swIg<sup>+</sup> B cell population via a double discrimination gate where cells must be double positive for both ancestral RBD-BV421 and -PE to be considered as antigen-specific. Cross-reactivity to XBB.1.5 and SARS-CoV-1 RBD were further determined from the gated total RBD<sup>+</sup> swIg<sup>+</sup> B cell population. For the latter, GC B cells (GL-7<sup>+</sup> CD95<sup>+</sup>) were identified from the activated B cell population, and those binding non-specifically to SA<sub>v</sub> were excluded using decoy SA<sub>v</sub> probe. RBD-specific GC B cells were subsequently identified from the SA<sub>v</sub><sup>-</sup> GC B cell population via double discrimination gating.

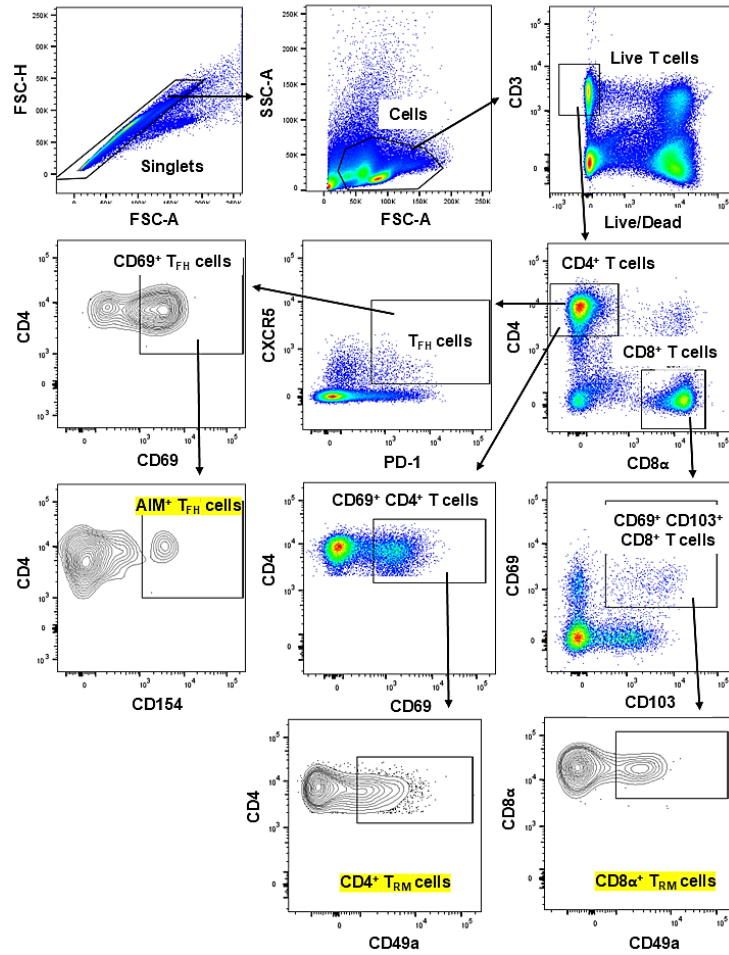

**Figure S11. Gating strategy to identify AIM<sup>+</sup> T<sub>FH</sub> and T<sub>RM</sub> cells.** Single cells were first identified via FSC-H/FSC-A and SSC-A/FSC-A. Dead cells were excluded with eFluor780 Fixable Viability Dye, and CD4<sup>+</sup> and CD8<sup>+</sup> T cells were identified from the total live T cell (Live/Dead<sup>-</sup> CD3<sup>+</sup>) population. AIM<sup>+</sup> T<sub>FH</sub> cells were examined by first identifying total T<sub>FH</sub> cells (CXCR5<sup>+</sup> PD-1<sup>+</sup>) from the CD4<sup>+</sup> T cell population, followed by gating on those that are double positive for both CD69 and CD154 AIM. T<sub>RM</sub> cells in lung and NALT tissues were identified from total CD4<sup>+</sup> and CD8<sup>+</sup> T cells by gating into CD69<sup>+</sup> and CD69<sup>+</sup> CD103<sup>+</sup> populations respectively, followed by further gating into cells that were also CD49a<sup>+</sup> (CD4<sup>+</sup>: CD69<sup>+</sup> CD49a<sup>+</sup>, CD8<sup>+</sup>: CD69<sup>+</sup> CD103<sup>+</sup> CD49a<sup>+</sup>).

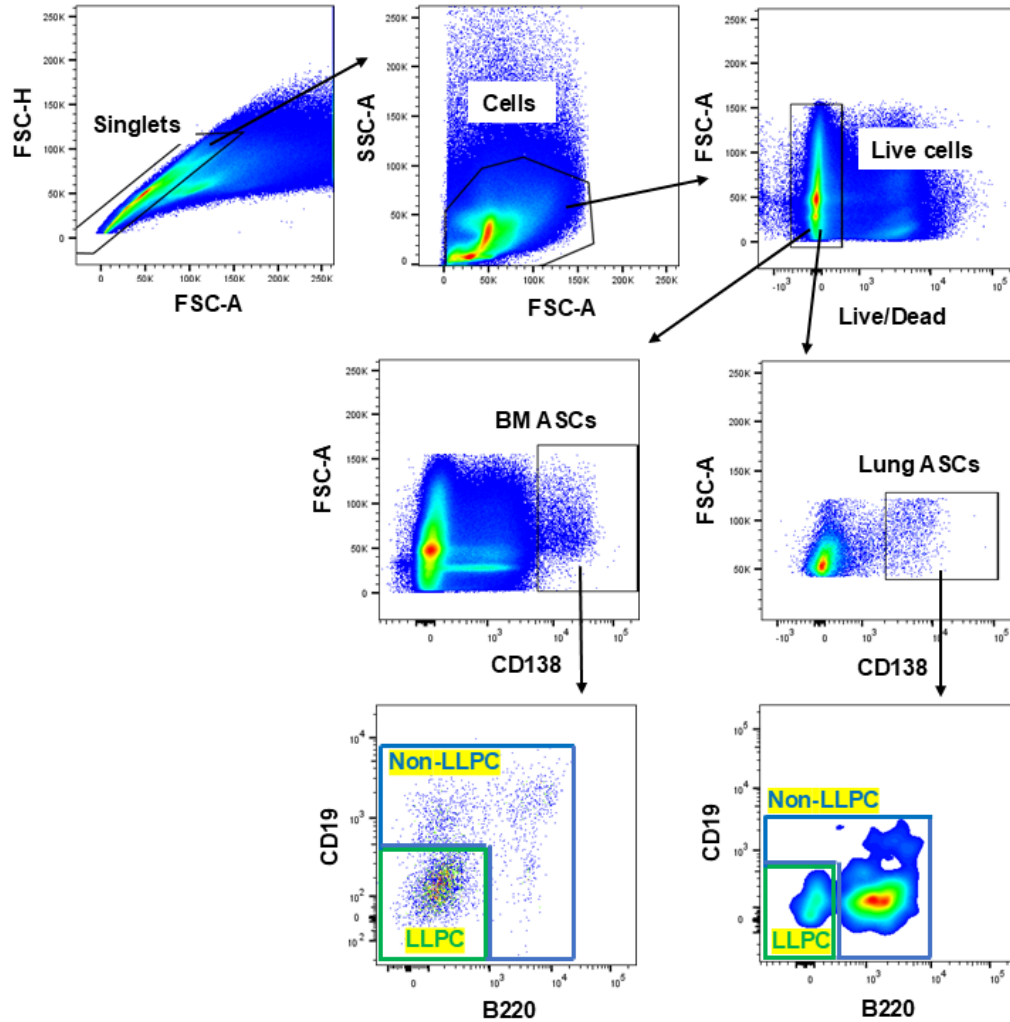

**Figure S12. Gating strategy for sorting BM and lung LLPC and non-LLPC ASC subsets.** Single cells were first identified via FSC-H/FSC-A and SSC-A/FSC-A. Dead cells were excluded with eFluor780 Fixable Viability Dye, and BM and lung ASC populations were identified as live cells that highly express CD138 (Live/Dead<sup>-</sup> CD138<sup>hi</sup>). Boolean gating was subsequently applied to identify LLPC and non-LLPC ASC subsets based on their expression of B220 and CD19; LLPC = CD138<sup>hi</sup> B220<sup>lo</sup> CD19<sup>lo</sup> (green), non-LLPC = inverse of LLPC gating (blue).

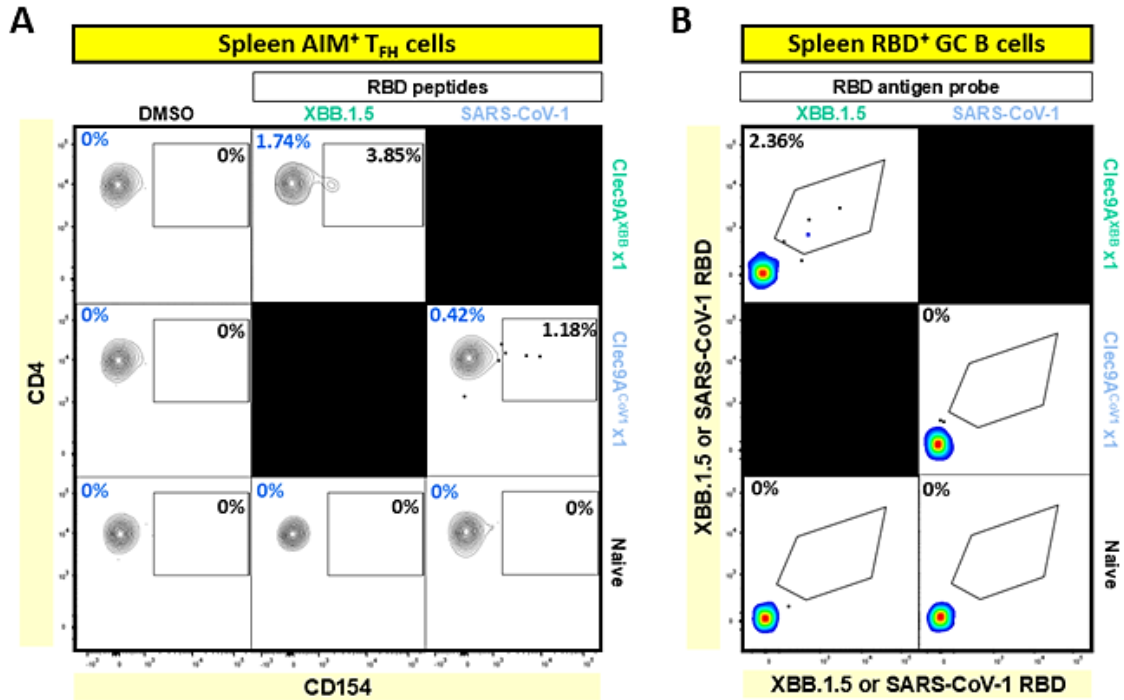

**Figure S13. Representative flow cytometric analysis results of AIM<sup>+</sup> T<sub>FH</sub> and RBD<sup>+</sup> GC B cells following single dose Clec9A<sup>XBB</sup> or Clec9A<sup>CoV1</sup> immunization. (A)** Representative plots of spleen AIM<sup>+</sup> T<sub>FH</sub> cells at six months post-boost. Values indicated in black and blue represent percentage AIM<sup>+</sup> T<sub>FH</sub> cells out of CD69<sup>+</sup> T<sub>FH</sub> cells and total T<sub>FH</sub> cells respectively. **(B)** Representative plots of RBD-specific spleen GC B cells at six months post-boost.

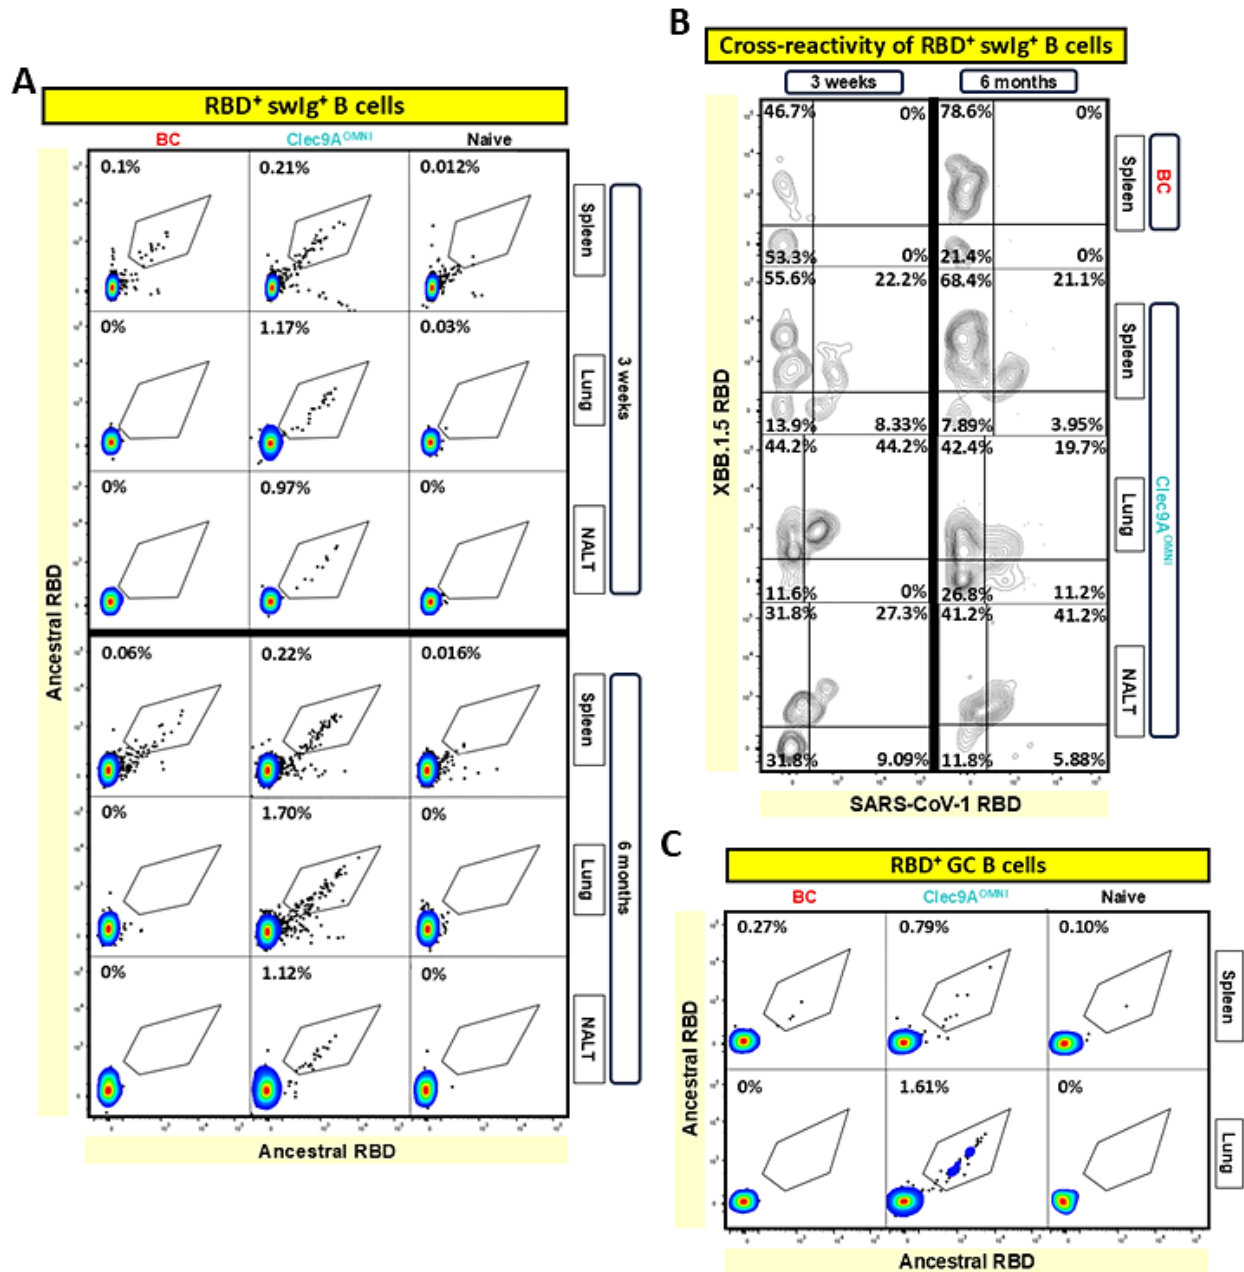

**Figure S14.** Representative flow cytometric analysis results of antigen-specific B cell subsets following BC mRNA vaccine and Clec9A<sup>OMNI</sup> booster immunization. (A, B) Representative plots of ancestral SARS-CoV-2 RBD-specific spleen, lung and NALT (A) swIg<sup>+</sup> B cells and their (B) cross-reactivity to XBB.1.5 and SARS-CoV-1 RBD, at three weeks and six months post-boost. (C) Representative plots of RBD-specific spleen and lung GC B cells at six months post-boost.



CD4<sup>+</sup> and CD8<sup>+</sup> T<sub>RM</sub> cells at one-month post-boost. Values indicated in black and blue represent percentage T<sub>RM</sub> cells out of CD69<sup>+</sup> CD4<sup>+</sup> or CD69<sup>+</sup> CD103<sup>+</sup> CD8<sup>+</sup> T cells, and total CD4<sup>+</sup> or CD8<sup>+</sup> T cells respectively.

**Table S1. Sarbecovirus RBD antigens used in the Multiplex sVNT.**

| Clade | Sarbecovirus           | Variant/Strain                                                 | Source                                                         |
|-------|------------------------|----------------------------------------------------------------|----------------------------------------------------------------|
| 1B    | Pre-Omicron SARS-CoV-2 | Ancestral                                                      | Custom made by Genscript                                       |
|       |                        | Alpha                                                          |                                                                |
|       |                        | Beta                                                           |                                                                |
|       |                        | Delta                                                          | ACROBiosystems, SPD-C82Ed                                      |
|       |                        | Delta Plus                                                     | Produced in-house in HEK293T cells as described previously (2) |
|       |                        | Lambda                                                         |                                                                |
|       |                        | Mu                                                             |                                                                |
|       | Omicron SARS-CoV-2     | BA.1                                                           | ACROBiosystems, SPD-C522K                                      |
|       |                        | BA.2                                                           | ACROBiosystems, SPD-C82Eq                                      |
|       |                        | BA.4/5                                                         | ACROBiosystems, SPD-C82Ew                                      |
|       |                        | XBB.1.5                                                        | Produced in-house in HEK293T cells as described previously (2) |
|       |                        | EG.5                                                           |                                                                |
|       |                        | JN.1                                                           |                                                                |
|       | Bat                    | RaTG13                                                         | Custom made by Genscript                                       |
|       |                        | BANAL-52                                                       | Produced in-house in HEK293T cells as described previously (2) |
|       |                        | B21065                                                         |                                                                |
|       | Pangolin               | Gx-P5L                                                         | Custom made by Genscript                                       |
| GD-1  |                        | Produced in-house in HEK293T cells as described previously (2) |                                                                |
| 1A    | Bat                    | Rs2018B                                                        | Produced in-house in HEK293T cells as described previously (2) |
|       |                        | RsSHC014                                                       |                                                                |
|       |                        | WIV-1                                                          |                                                                |
|       | SARS-CoV-1             | SARS-CoV-1                                                     | Custom made by Genscript                                       |

**Table S2. Antibodies used for flow cytometry staining of antigen-specific B cell subsets, AIM<sup>+</sup> T<sub>FH</sub> cells, T<sub>RM</sub> cells, and sorting of LLPC and non-LLPC ASC subsets.**

| Marker                                          | Fluorophore     | Manufacturer & catalogue # | Dilution/Concentration |
|-------------------------------------------------|-----------------|----------------------------|------------------------|
| <b>RBD<sup>+</sup> swIg<sup>+</sup> B cells</b> |                 |                            |                        |
| B220                                            | Alexa Fluor 488 | BD Biosciences, 557669     | 1:200                  |
| IgM                                             | BUV395          | BD Biosciences, 564025     |                        |
| IgD                                             |                 | BD Biosciences, 564274     |                        |
| Decoy (SAv)                                     | BV605           | BD Biosciences, 563260     | 1 µg/mL                |
| Ancestral RBD                                   | BV421           |                            |                        |
|                                                 | PE              |                            |                        |
| XBB.1.5 RBD                                     | BV711           |                            |                        |
| SARS-CoV-1 RBD                                  | APC             |                            |                        |
| <b>RBD<sup>+</sup> GC B cells</b>               |                 |                            |                        |
| B220                                            | BUV395          | BD Biosciences, 563793     | 1:200                  |
| IgD                                             | BV711           | BD Biosciences, 564275     |                        |
| GL-7                                            | Alexa Fluor 647 | BD Biosciences, 561529     |                        |
| CD95                                            | BV605           | Biologend, 152612          |                        |
| Decoy (SAv)                                     | BB515           | BD Biosciences, 564453     | 1 µg/mL                |
| Ancestral RBD                                   | BV421           |                            |                        |
|                                                 | PE              |                            |                        |
| <b>AIM<sup>+</sup> T<sub>FH</sub> cells</b>     |                 |                            |                        |
| CD3                                             | FITC            | BD Biosciences, 555274     | 1:200                  |
| CD4                                             | BUV395          | BD Biosciences, 563790     |                        |
| CXCR5                                           | APC             | BD Biosciences, 560615     |                        |
| PD-1                                            | BV605           | BD Biosciences, 563059     |                        |
| CD69                                            | BV421           | BD Biosciences, 562920     |                        |
| CD154                                           | PE              | BD Biosciences, 553658     |                        |
| <b>T<sub>RM</sub> cells</b>                     |                 |                            |                        |
| CD3                                             | FITC            | BD Biosciences, 555274     | 1:200                  |
| CD4                                             | BUV395          | BD Biosciences, 563790     |                        |
| CD8α                                            | BV711           | BD Biosciences, 563046     |                        |
| CD69                                            | BV421           | BD Biosciences, 562920     |                        |
| CD103                                           | APC             | BD Biosciences, 562772     |                        |
| CD49a                                           | PE              | BD Biosciences, 562115     |                        |
| <b>LLPC and non-LLPC ASC subset sorting</b>     |                 |                            |                        |
| CD138                                           | BV605           | BD Biosciences, 563147     | 1:200                  |
| B220                                            | Alexa Fluor 488 | BD Biosciences, 557669     |                        |
| CD19                                            | BUV395          | BD Biosciences, 563557     |                        |
